# Supplementary material
Source: publisher figshare collection journal article supplement (https://frontiersin.figshare.com/ndownloader/files/23425895)

**Supplementary Figure 7. Numbers of tillers and branches at 50% recommended dose of fertilizer (RDF).** Number of tillers and branches in finger millet (dark shaded bars) and pigeon pea (light shaded bars) respectively at 50% RDF at Bangalore and Kolli Hills for the two cropping seasons 2014-15 and 2015-16. Each error bar indicates +1 standard deviation of the mean. Bars not sharing the same letters are significantly different at  $p < 0.05$ .

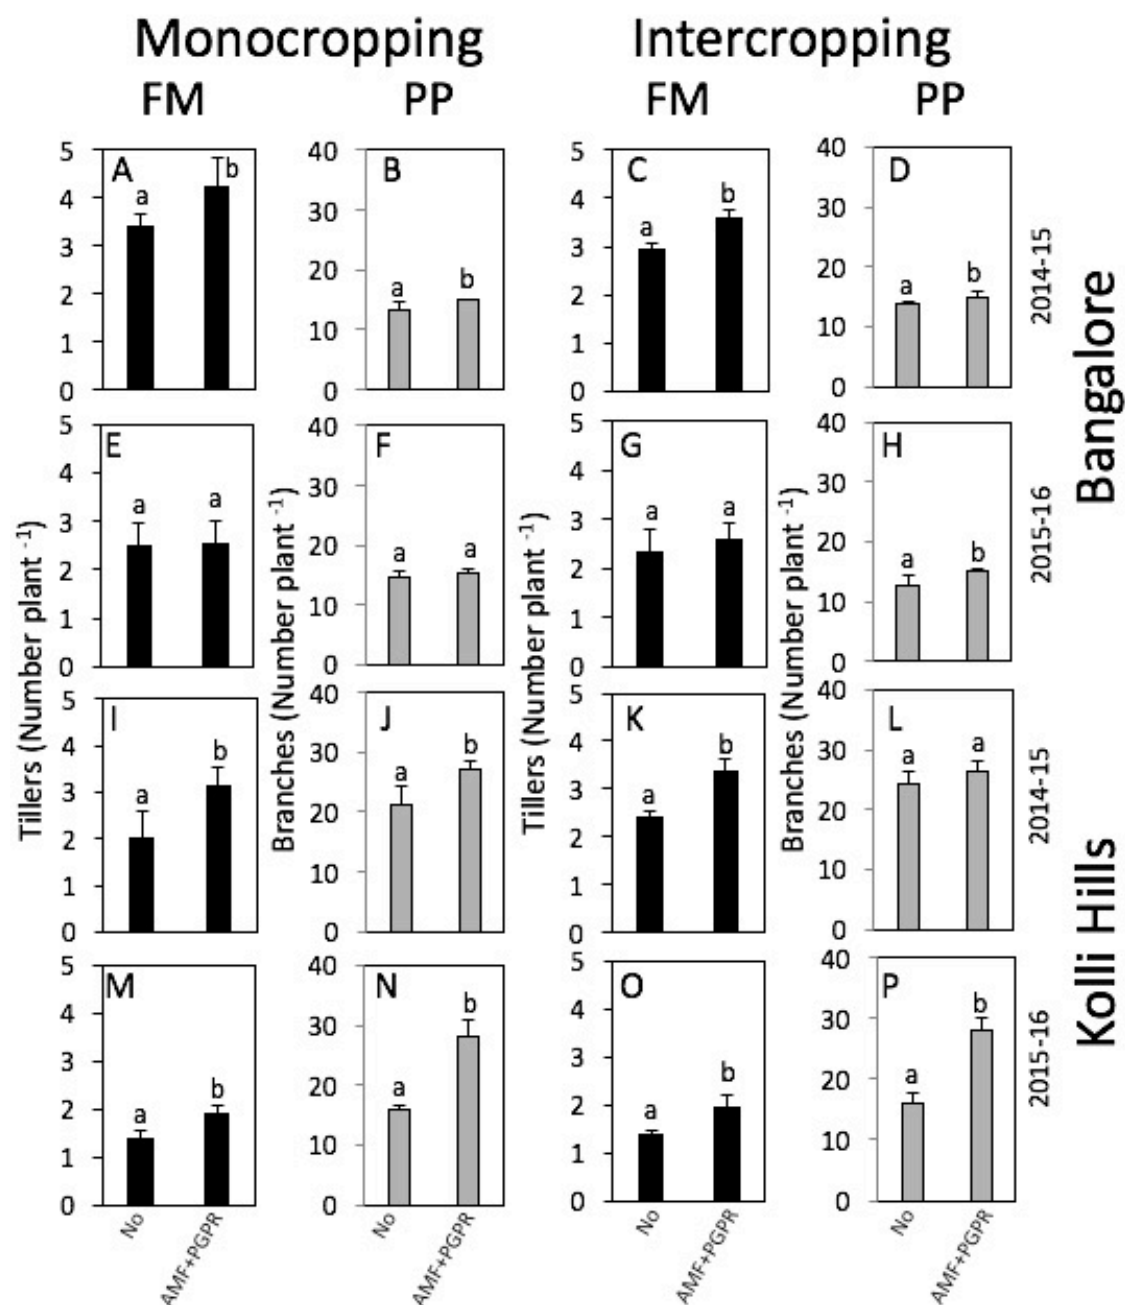

Supplement: Supplementary file 1 [file 23425895]
